# Supplementary material
Source: PubMed Central journal article supplement (PMC7350929)
Supplement: NIHMS1599870-supplement-Supplementary_Data.pdf [file NIHMS1599870-supplement-Supplementary_Data.pdf]

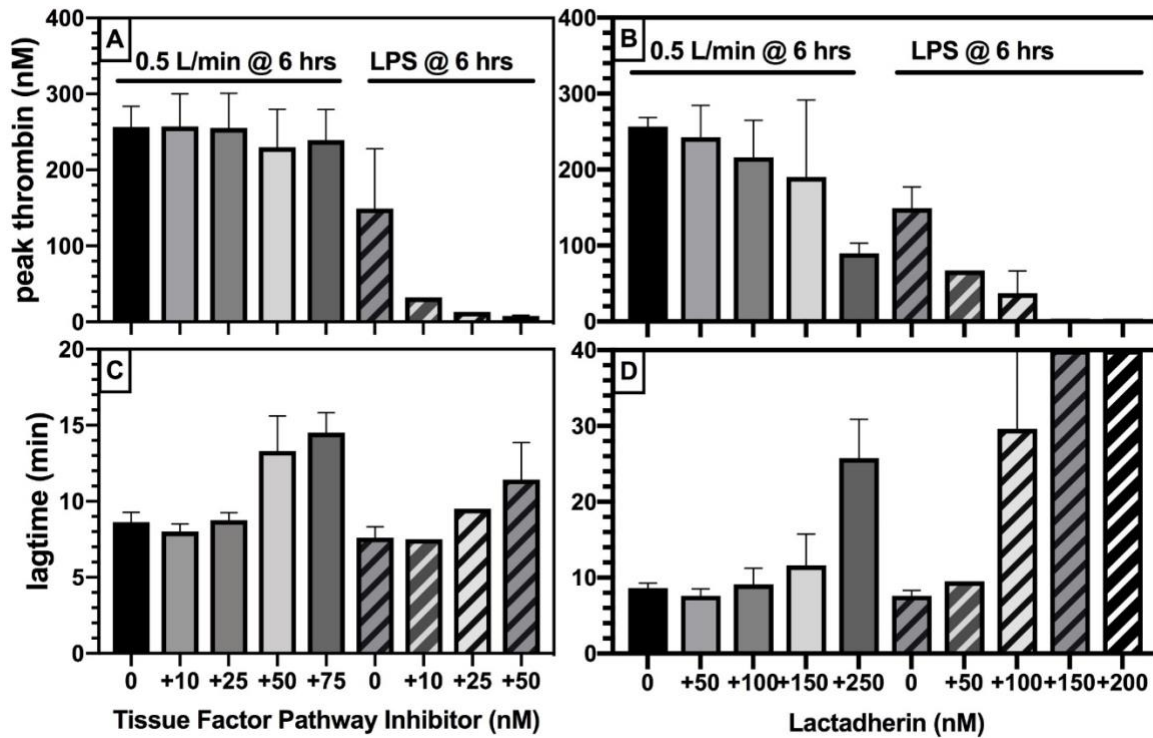

**Supplemental Data 1 Tissue Factor Pathway Inhibitor (TFPI) and Lactadherin Titration:** Solid bars represent plasma samples obtained from simulated neonatal ECMO studies at 0.5 L/min after six hours of circulation. Striped bars represent plasma samples obtained from whole blood stimulated with LPS for six hours (please see Oliver et al). Data documented as mean±sem. (A) Peak thrombin inhibition of thrombogram due to increasing concentration of TFPI (nM) (B) Peak thrombin inhibition of thrombogram due to increasing concentration of lactadherin (nM). (C) Lagtime inhibition of thrombogram due to increasing concentration of TFPI (nM), (D) Lagtime inhibition of thrombogram due to increasing final concentration of lactadherin (nM),

## Supplemental Data 2: Thromboelastography Values

| Category |             | Control   | 0.3 L/min | 0.5 L/min  | 0.7 L/min  |
|----------|-------------|-----------|-----------|------------|------------|
|          |             | mean±sem  | mean±sem  | mean±sem   | mean±sem   |
| Baseline | R (min)     | 7.1±0.4   | 7.9±0.7   | 6.7±0.8    | 6.7±0.5    |
|          | K (min)     | 2.2±0.1   | 2.5±0.1   | 2.1±0.2    | 2.1±0.1    |
|          | Angle (°)   | 55±2.2    | 52.3±4.1  | 52±4.5     | 61±1.4     |
|          | MA (mm)     | 64±1.0    | 64±1.4    | 64±1.7     | 67.2±1.3   |
|          | G (dyn/sec) | 9207±424  | 8277±652  | 9096±697   | 10363650   |
|          | LY60 (%)    | 3.8±0.5   | 4.3±0.4   | 3.3±1.6    | 3.7±0.5    |
| 0 hours  | R (min)     | 5.59±0.22 | 5.76±0.52 | 5.32±0.15  | 5.7±0.4    |
|          | K (min)     | 1.9±0.1   | 2.04±0.2  | 1.86±0.2   | 1.7±0.1    |
|          | Angle (°)   | 64.6±1.30 | 62.1±2.56 | 65.2±2.4   | 66.6±1.8   |
|          | MA (mm)     | 61±0.92   | 61±1.56   | 60±1.5     | 62.9±0.6   |
|          | G (dyn/sec) | 7721±289  | 7128±611  | 7267±473   | 8496±215   |
|          | LY60 (%)    | 3.9±0.6   | 4.6±0.5   | 2.4±1.68   | 4.7±0.7    |
| 1 hours  | R (min)     | 5.5±0.3   | 4.7±0.4   | 4.6±0.43   | 3.8±0.9    |
|          | K (min)     | 1.7±0.1   | 1.5±0.1   | 1.8±0.4    | 1.2±0.1    |
|          | Angle (°)   | 66±2.1    | 69±1.8    | 69±1.58    | 73±1.1     |
|          | MA (mm)     | 62±1.1    | 66±1.74   | 65±1.9     | 67±1.3     |
|          | G (dyn/sec) | 7968±293  | 7369±735  | 9035±785   | 10241±5812 |
|          | LY60 (%)    | 3.9±0.7   | 4.3±0.7   | 2.0±1.0    | 4.0±0.6    |
| 2 hours  | R (min)     | 4.7±0.2   | 3.3±0.5   | 3.8±0.2    | 2.8±0.2    |
|          | K (min)     | 1.5±0.1   | 1.6±0.1   | 1.3±0.1    | 1.1±0.04   |
|          | Angle (°)   | 68±1.4    | 68±1.4    | 73±1.2     | 73±0.7     |
|          | MA (mm)     | 63±1.0    | 64±1.9    | 61±1.8     | 67±1       |
|          | G (dyn/sec) | 8280±428  | 7881±651  | 9156±913   | 10375±534  |
|          | LY60 (%)    | 3.5±0.6   | 2.9±0.6   | 2.3±0.8    | 2.6±0.5    |
| 4 hours  | R (min)     | 4.4±0.2   | 2.7±0.3   | 3.9±0.2    | 2.2±0.1    |
|          | K (min)     | 1.5±0.1   | 1.2±0.2   | 1.5±0.2    | 1.4±0.3    |
|          | Angle (°)   | 69±1.0    | 67±4.6    | 70±2.1     | 72±3.6     |
|          | MA (mm)     | 62.2±1.1  | 61±4.0    | 59±5.4     | 65±3.2     |
|          | G (dyn/sec) | 8165±374  | 7727±1651 | 9677±821   | 9506±1251  |
|          | LY60 (%)    | 2.3±0.4   | 2.3±1.0   | 1.7±0.9    | 2.1±0.6    |
| 6 hours  | R (min)     | 3.5±0.2   | 2.9±0.5   | 3.3±0.2    | 2±0.1      |
|          | K (min)     | 1.5±0.1   | 1.2±0.05  | 1.2±0.2    | 1.1±0.1    |
|          | Angle (°)   | 69±1.7    | 69±3.6    | 72±2.1     | 76±0.3     |
|          | MA (mm)     | 64±1.4    | 67±1.8    | 67±2.3     | 67±1.9     |
|          | G (dyn/sec) | 8932±514  | 5569±2066 | 10483±1042 | 10356±1425 |
|          | LY60 (%)    | 0.4±0.7   | 2.3±1.0   | 1.7±0.94   | 0.5±0.05   |

SEM is standard error of the mean, ns means not significantly greater than  $p > 0.05$ , using Tukeys multiple comparison test, in comparing the respective flow rate with static control. R is reaction time a measure of clot initiation time, K is kaolin a measure of clot formation time, angle is at clot reaction rate, MA is maximum amplitude a measure of a clot strength, G is a measure of clot elasticity, LY60 is percentage of clot lysis at 60 minutes.

### Supplemental Data 3: Coagulation Tests

| Category |                    | Control   | 0.3 L/min | 0.5 L/min | 0.7 L/min |
|----------|--------------------|-----------|-----------|-----------|-----------|
|          |                    | mean±sem  | mean±sem  | mean±sem  | mean±sem  |
| Baseline | INR                | 1.1±0.03  | 1.1±0.04  | 1.0±0.03  | 1.2±0.1   |
|          | PTT (sec)          | 29±0.7    | 30±1.9    | 29±1.1    | 29±0.6    |
|          | Fibrinogen (mg/dL) | 290±13    | 256±21    | 297±10    | 318±29    |
|          | d-dimer (µg/mL)    | 0.32±0.13 | 0.26±0.09 | 0.21±0.07 | 0.37±0.05 |
|          | ACT (sec)          | 188±7.3   | 202±12.9  | 170±7.0   | 192±14    |
|          | AT3 (%)            | 103±2.9   | 105±3.9   | 102±5.9   | 101±6.0   |
|          | vWF (%)            | 104±8.7   | 86±9      | 98±16     | 113±3.7   |
| 0 hours  | INR                | 1.2±0.02  | 1.2±0.04  | 1.1±0.03  | 1.3±0.04  |
|          | PTT (sec)          | 33±0.8    | 34±2.0    | 33±1.0    | 32±0.8    |
|          | Fibrinogen (mg/dL) | 272±12    | 245±26    | 283±6.9   | 288±24    |
|          | d-dimer (µg/mL)    | 0.31±0.09 | 0.28±0.04 | 0.32±0.04 | 0.31±0.05 |
|          | ACT (sec)          | 201±3.7   | 198±7.0   | 192±5.0   | 213±4.2   |
|          | AT3 (%)            | 98±2.6    | 98±2.1    | 95±5.0    | 92±4.9    |
|          | Anti-Xa (U)        | 0.24±0.02 | 0.27±0.02 | 0.20±0.03 | 0.24±0.02 |
| vWF (%)  | 98±8.2             | 79±8.1    | 92±12     | 107±4.4   |           |
| 1 hour   | INR                | 1.2±0.03  | 1.2±0.04  | 1.17±0.04 | 1.3±0.06  |
|          | PTT (sec)          | 33±0.8    | 34±2.1    | 33±1.03   | 32±0.4    |
|          | Fibrinogen (mg/dL) | 272±12    | 245±23    | 284±9.1   | 290±23    |
|          | d-dimer (µg/mL)    | 0.27±0.1  | 0.30±0.1  | 0.27±0.08 | 0.30±0.05 |
|          | ACT (sec)          | 192±4.3   | 202±8.6   | 191±6.1   | 218±7.0   |
|          | AT3 (%)            | 95±2.3    | 98±2.9    | 95±5.1    | 92±5.4    |
|          | Anti-Xa (U)        | 0.24±0.02 | 0.26±0.01 | 0.20±0.04 | 0.25±0.03 |
| vWF (%)  | 95±7.6             | 80±7.2    | 97±13     | 102±5.4   |           |
| 2 hours  | INR                | 1.20±0.02 | 1.2±0.04  | 1.2±0.04  | 1.4±0.05  |
|          | PTT (sec)          | 32±0.9    | 32±1.8    | 33±1.3    | 32±0.7    |
|          | Fibrinogen (mg/dL) | 269±14    | 251±29    | 280±9.7   | 280±9.7   |
|          | d-dimer (µg/mL)    | 0.28±0.12 | 0.22±0.05 | 0.31±0.04 | 0.33±0.04 |
|          | ACT (sec)          | 200±3.6   | 190±1.9   | 172±5.1   | 216±2.7   |
|          | AT3 (%)            | 95±2.1    | 99±1.8    | 95±5.1    | 93±5.1    |
|          | Anti-Xa (U)        | 0.26±0.02 | 0.29±0.02 | 0.23±0.04 | 0.26±0.02 |
| vWF (%)  | 110±12             | 83±8.0    | 98±12     | 110±5.8   |           |
| 4 hours  | INR                | 1.2±0.02  | 1.4±0.09  | 1.3±0.04  | 1.5±0.2   |
|          | PTT (sec)          | 33±0.8    | 32±2.8    | 34±1.1    | 29±1.6    |
|          | Fibrinogen (mg/dL) | 278±13    | 218±43    | 288±11    | 265±34    |
|          | d-dimer (µg/mL)    | 0.26±0.1  | 0.40±0.14 | 0.30±0.03 | 0.89±0.43 |
|          | ACT (sec)          | 220±11    | 186±8.3   | 197±4.2   | 222±11    |
|          | AT3 (%)            | 93±3.1    | 95±4.2    | 96±4.8    | 91±7.4    |
|          | Anti-Xa (U)        | 0.29±0.02 | 0.30±0.02 | 0.27±0.04 | 0.25±0.01 |
| vWF (%)  | 97±8.6             | 88±9.2    | 99±12     | 109±6.8   |           |
| 6 hours  | INR                | 1.3±0.03  | 2.3±0.4   | 1.3±0.04  | 1.55±0.09 |
|          | PTT (sec)          | 32±1.2    | 36±1.1    | 33±1.1    | 25±0.8    |
|          | Fibrinogen (mg/dL) | 257±17    | 108±51    | 297±9.7   | 229±0     |
|          | d-dimer (µg/mL)    | 0.42±0.1  | 2.14±1.78 | 0.31±0.03 | 0.98±0    |
|          | ACT (sec)          | 228±15    | 179±8     | 189±7.3   | 200±12    |
|          | AT3 (%)            | 93±2.9    | 86±11     | 100±5.9   | 99±6.0    |
|          | Anti-Xa (U)        | 0.28±0.02 | 0.28±0.01 | 0.26±0.03 | 0.17±0    |
| vWF (%)  | 97±11              | 72±15     | 105±13    | 106±0     |           |

SEM is standard error of the mean, INR is international normalization ratio, PTT is partial thromboplastin time, ACT is activated clotting time, AT3 is anti-thrombin III activity, and vWF is von Willebrand activity.
